# Supplementary material
Source: ML conference proceedings conference paper supplement (https://proceedings.neurips.cc/paper_files/paper/2010/hash/da4fb5c6e93e74d3df8527599fa62642-Abstract.html)
Supplement: Supplementary file 1 [file da4fb5c6e93e74d3df8527599fa62642-Supplemental.zip]

Archive with 1 entries (1 files):
- extra/NIPS2010_0120_extra.pdf
