# Supplementary material
Source: ML conference proceedings conference paper supplement (https://proceedings.neurips.cc/paper_files/paper/2010/hash/da4fb5c6e93e74d3df8527599fa62642-Abstract.html)
Supplement: Supplementary file 1 [file da4fb5c6e93e74d3df8527599fa62642-Supplemental.zip › extra/NIPS2010_0120_extra.pdf]

---

# Supplementary Material: Large-Scale Matrix Factorization with Missing Data under Additional Constraints

---

**Kaushik Mitra**

Department of Electrical and Computer Engineering and UMIACS  
University of Maryland, College Park, MD 20742  
kmitra@umiacs.umd.edu

**Sameer Sheorey**

Toyota Technological Institute, Chicago  
ssameer@ttic.edu

**Rama Chellappa**

Department of Electrical and Computer Engineering and UMIACS  
University of Maryland, College Park, MD 20742  
rama@umiacs.umd.edu

## Abstract

We present results from our experiments that we could not include in the main paper [2].

## 1 Experimental Evaluation

We compare the timing performance of MF-LRSDP, OptSpace, alternation and damped Newton for various synthetic and real experiments.

### 1.1 Evaluation with Synthetic Data

**Exact Factorization: vary size.** Figure shows the time (in seconds, log-scale) that MF-LRSDP and OptSpace takes for factorization of rank 5 matrices of different sizes  $n$ . Clearly, MF-LRSDP is more efficient.

**Exact Factorization: vary rank.** Figure shows the time (in seconds, log-scale) that MF-LRSDP and OptSpace takes for factorization of  $500 \times 500$  matrices of different ranks  $r$ . Again, MF-LRSDP takes lesser time for reconstruction.

**Noisy Factorization: vary noise standard deviation.** We vary the standard deviation  $\sigma$  of the additive noise for rank 5,  $200 \times 200$  matrices and study the timing performance by MF-LRSDP, OptSpace, alternation and damped Newton. MF-LRSDP takes more time than OptSpace because the noise terms are treated as variables in MF-LRSDP. This might seem like a disadvantage, but it also makes MF-LRSDP more flexible as we can, potentially, minimize the  $L_1$  norm of noise instead of the  $L_2$  norm within the same framework.

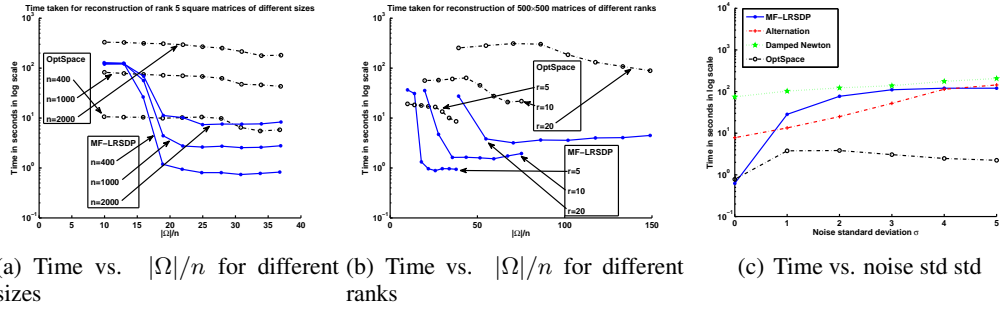

Figure 1: (a) Time (in seconds, log scale) taken for reconstruction vs.  $|\Omega|/n$  for rank 5 square matrices of different sizes  $n$  by MF-LRSDP and OptSpace. MF-LRSDP takes less time. (b) Time (in seconds, log scale) taken for reconstruction vs.  $|\Omega|/n$  for  $500 \times 500$  matrices of different ranks by MF-LRSDP and OptSpace. Again, MF-LRSDP is more efficient. (c) Time (in seconds, log scale) taken for reconstruction vs. noise standard deviation for rank 5,  $200 \times 200$  matrices by MF-LRSDP, OptSpace, alternation and damped Newton.

|                 | MF-LRSDP | Alternation | Damped Newton | OptSpace |
|-----------------|----------|-------------|---------------|----------|
| Dinosaur        | 35.5     | 29.3        | 8.2           | 1.4      |
| Longer Dinosaur | 91.8     | 145.6       | 39.0561       | 5.3376   |
| Giraffe         | 120.1    | 55.4        | 1395.9        | 9.7      |
| Face            | 46.5     | 122.6       | 33.1          | 8.2      |

Table 1: Average time (in seconds) taken for reconstruction of the four real sequences. OptSpace takes the least time but its reconstruction results are poor. Other algorithms give comparable results except for the Giraffe sequence where the damped Newton takes a long time to converge. This is because damped Newton is not efficient for (moderate-sized) square matrices.

## 1.2 Evaluation with Real Data

**Affine SfM.** We test the performance of MF-LRSDP, alternation, damped Newton and OptSpace on a 'longer Dinosaur'<sup>1</sup> sequence for which  $M$  is a  $72 \times 1441$  matrix. Figure 2 shows the cumulative histogram (of 25 trials) over the RMS pixel error. MF-LRSDP gives the best performance followed by damped Newton, alternation and OptSpace.

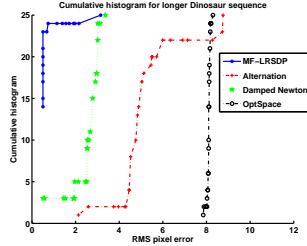

Figure 2: Cumulative histogram (of 25 trials) for the longer Dinosaur sequence. MF-LRSDP gives the best performance followed by damped Newton, alternation and OptSpace.

**Timing Evaluations of Real Data.** Table 1 shows the average time taken by the algorithms on the different sequences. We note that OptSpace is the most efficient algorithm, but its poor accuracy makes it unsuitable for our problems. Other algorithms give comparable timing result except for the Giraffe sequence where the damped Newton takes a long time to converge. This is because damped Newton is not efficient for moderate-sized square matrices. On the other hand, it is quite efficient for large tall or fat matrices (where either  $m$  or  $n$  is small) as can be seen for the face dataset, where  $M$  is a  $2944 \times 20$  matrix. This can be attributed to its 'reduced' implementation [1].

<sup>1</sup><http://www.robots.ox.ac.uk/vgg/data/data-mview.html>

## References

- [1] A. M. Buchanan and A. W. Fitzgibbon. Damped newton algorithms for matrix factorization with missing data. In *CVPR*, 2005.
- [2] K. Mitra, S. Sheorey, and R. Chellappa. Large-scale matrix factorization with missing data under additional constraints. In *NIPS*, 2010.
